# Supplementary material for: Investigation of local compositional uniformity in Cu2ZnSn(S,Se)4thin film solar cells prepared from nanoparticle inks
Source: Royal Society of Chemistry journal article supplement (doi:10.1039/c4ta02205j), 2014-06-13
Supplement: c4ta02205j1.pdf [file c4ta02205j1.pdf]

## Investigation of Local Compositional Uniformity in $\text{Cu}_2\text{ZnSn}(\text{S},\text{Se})_4$ Thin Film Solar Cells

Prepared from Nanoparticle Inks

Katherine E. Roelofs<sup>1</sup>, Qijie Guo\*, Shekhar Subramoney, Jonathan V Caspar

DuPont Central Research and Development, Experimental Station, Wilmington, DE 19880

### Supporting Information

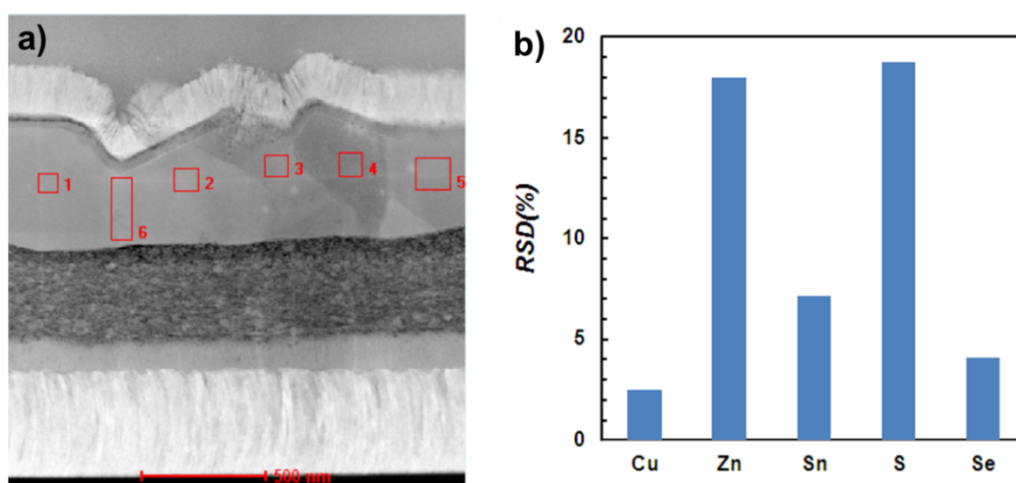

**Figure S1:** a) HAADF-TEM image showing the areas within the individual grains of the large-grain layer where EDS data were collected and b) relative standard deviations (*RSD%*) in the atomic percentages of the constituent elements determined from EDS. The observed compositional non-uniformity is in agreement with the STEM-EDS line scan laterally across the same region as shown in Figure 2. Please note that the measured Se/S atomic ratio is  $\sim 5$ , therefore the *RSD%* of S appears to be much larger than the *RSD%* of Se.

---

<sup>1</sup> Current Address: Department of Materials Science and Engineering, Stanford University, Stanford, CA 94305

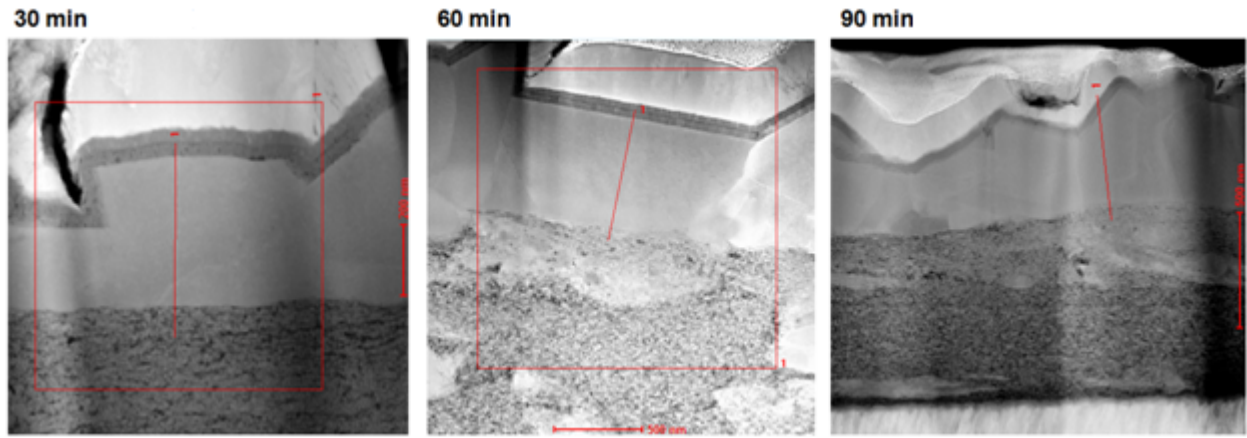

**Figure S2.** HAADF-TEM images corresponding to the exact EDS line scan paths shown in Figure 4d-f, for solar cells fabricated with CZTSSe thin films annealed at 560 °C for 30 minutes, 60 minutes, and 90 minutes.
